# Supplementary material for: Development of a general acid method for the digestion of gold ore samples together with a comparison of extraction solvents for gold and determination by microwave-induced plasma-atomic emission spectrometry (MIP-AES)
Source: Royal Society of Chemistry journal article supplement (doi:10.1039/c8ja00136g), 2018-01-01

### Supplementary Figures

SF 1: Au (I) 267.595 spectra of aqueous gold solution being aspirated in and washed out of the MP-4100 by 1 % HCl

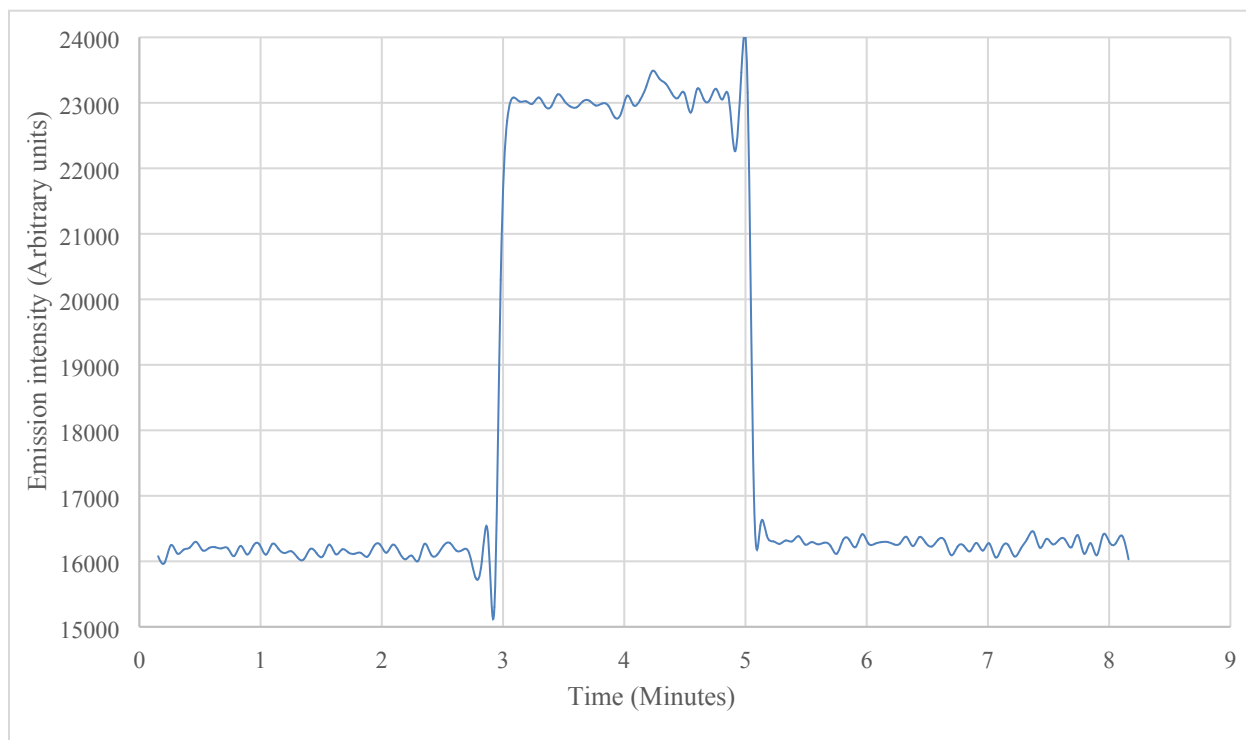

SF 2: Au (I) 267.595 spectra of 2-ethylhexanol gold solution being aspirated in and washed out of the MP-4100 by 3 M HCl extract

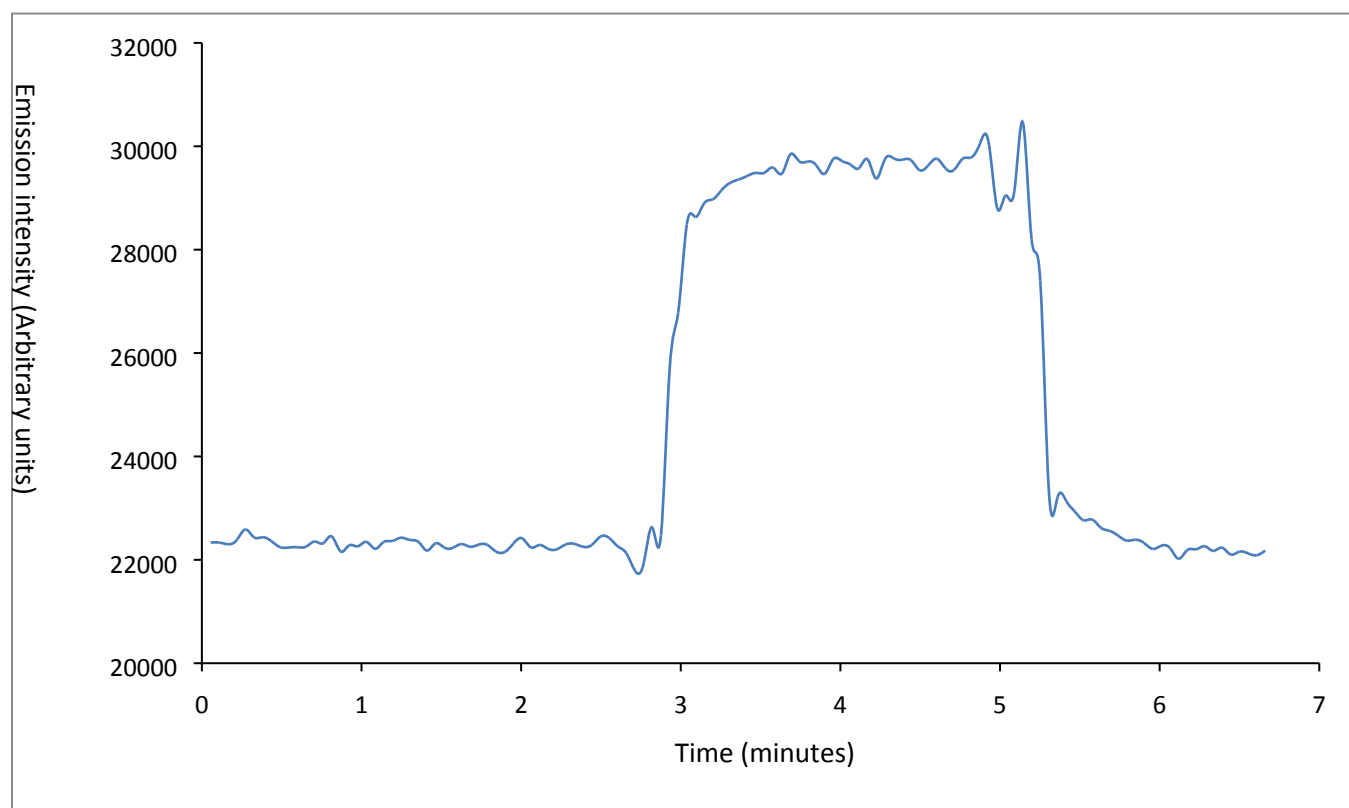

SF 3: Au (I) 267.595 spectra of MIBK gold solution being aspirated in and washed out of the MP-4100 from a 1 M HCl extract

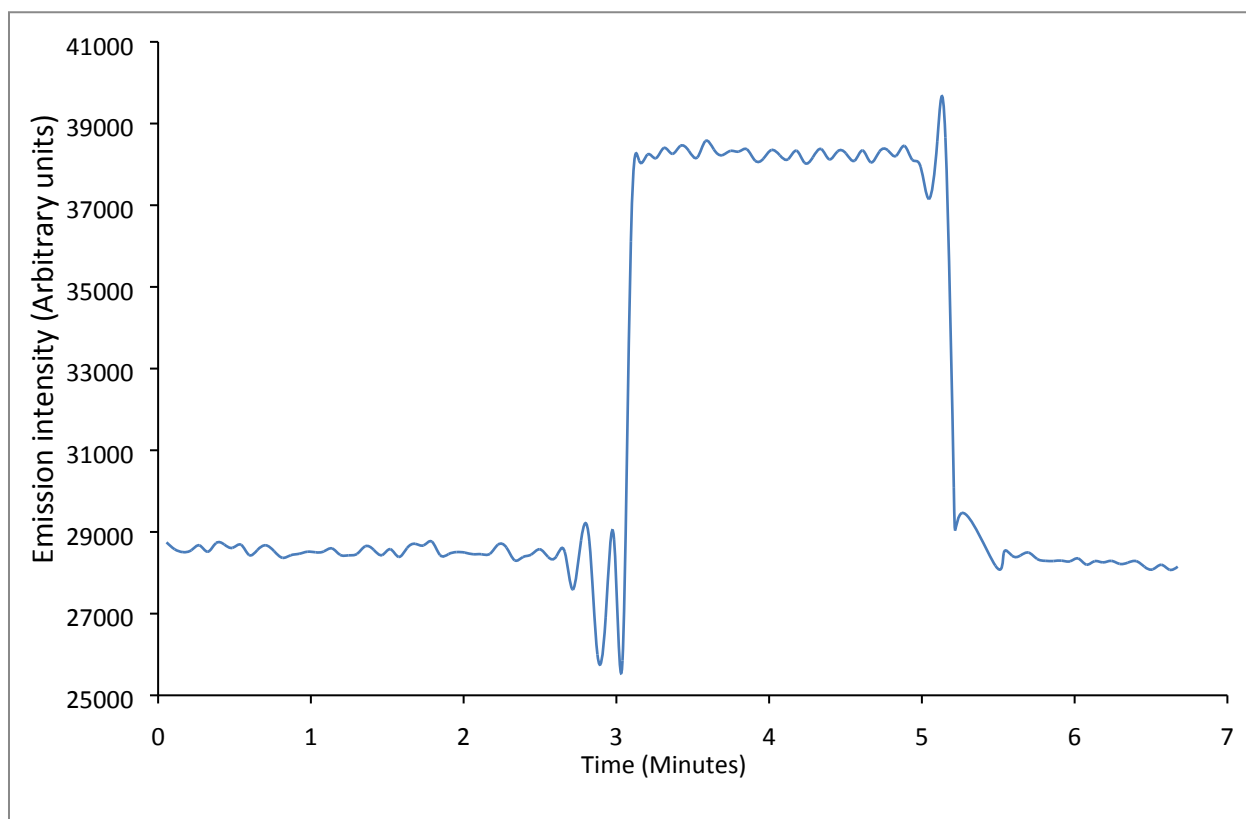

SF 4: wavelength scan at gold wavelength 267.595, aspirating nitric acid

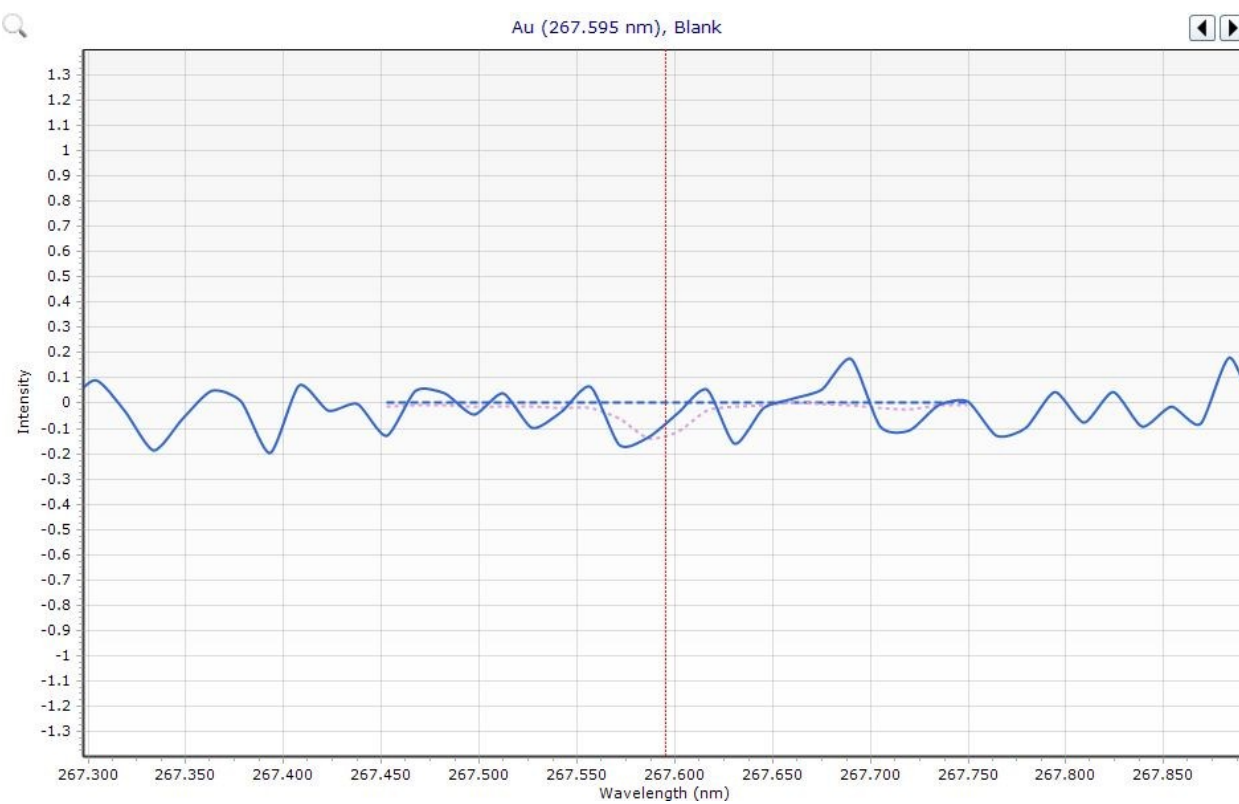

SF 5: Aspiration of  $90 \mu\text{g L}^{-1}\text{Au}$  and  $10 \text{ mg L}^{-1}\text{Fe}$  scan at gold wavelength 267.595

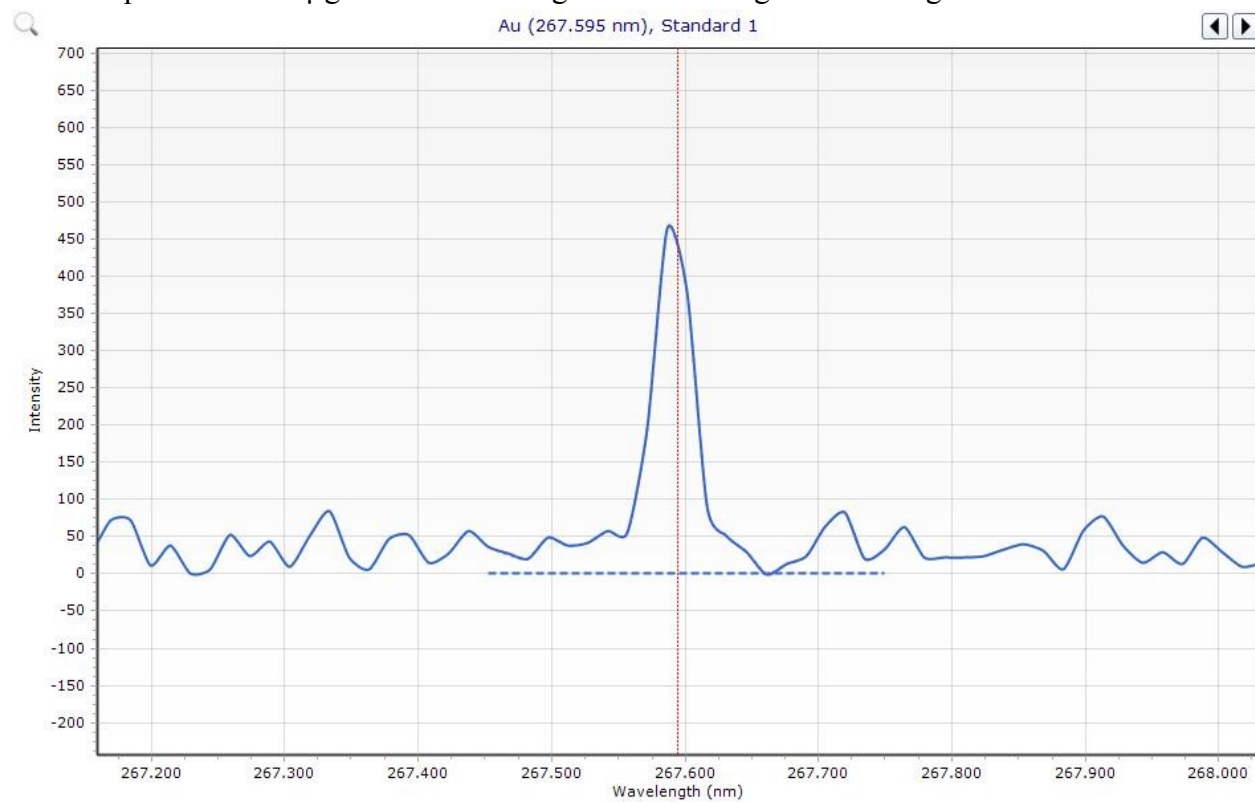

Supplement: c8ja00136g1.pdf [file c8ja00136g1.pdf]
